# Supplementary material
Source: Springer Nature journal article supplement (https://www.springermedizin.de/resource/supplementary/12967_2005_97_MOESM1_ESM.pdf/9575686)

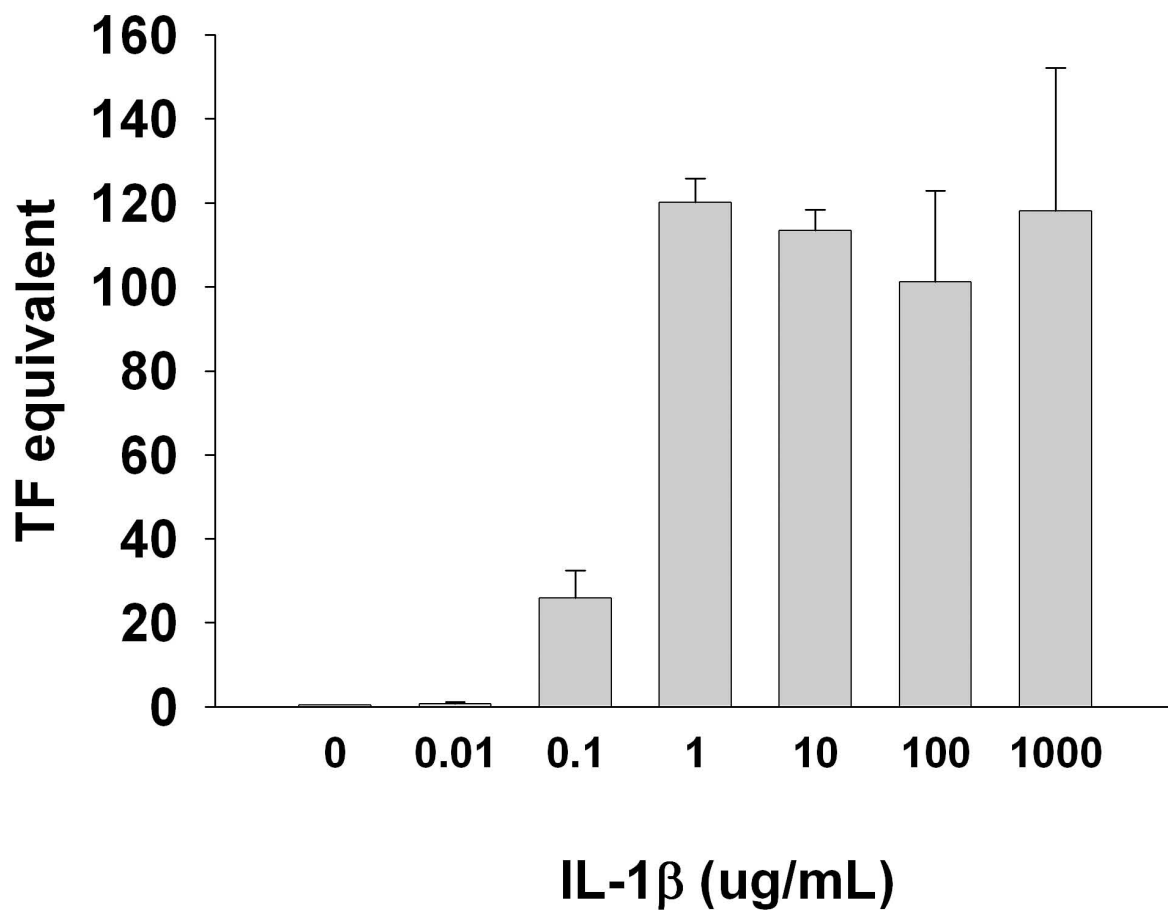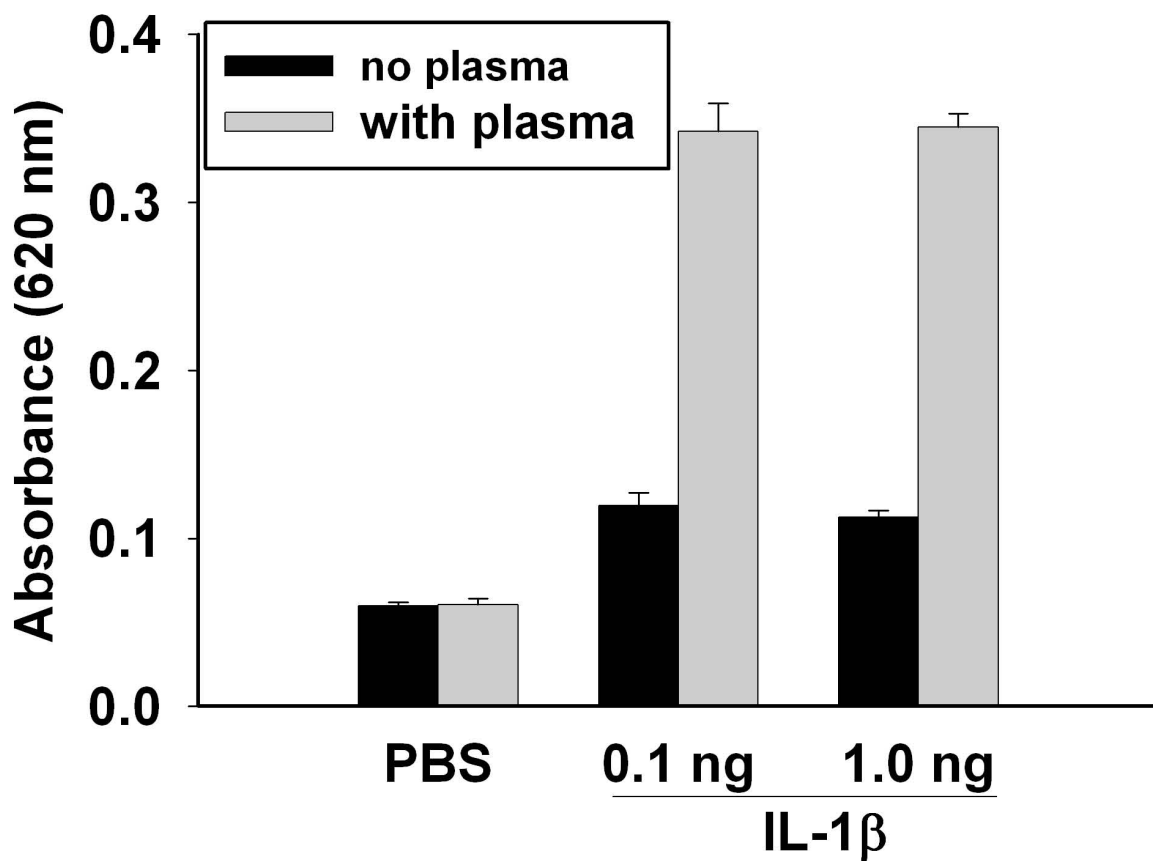

Supplement: MOESM1 [file 9575686]
